# Supplementary material for: AKBA Promotes Axonal Regeneration via RhoA/Rictor to Repair Damaged Sciatic Nerve
Source: MDPI journal article supplement (doi:10.3390/ijms232415903), 2022-12-14
Supplement: s1 [file s1]

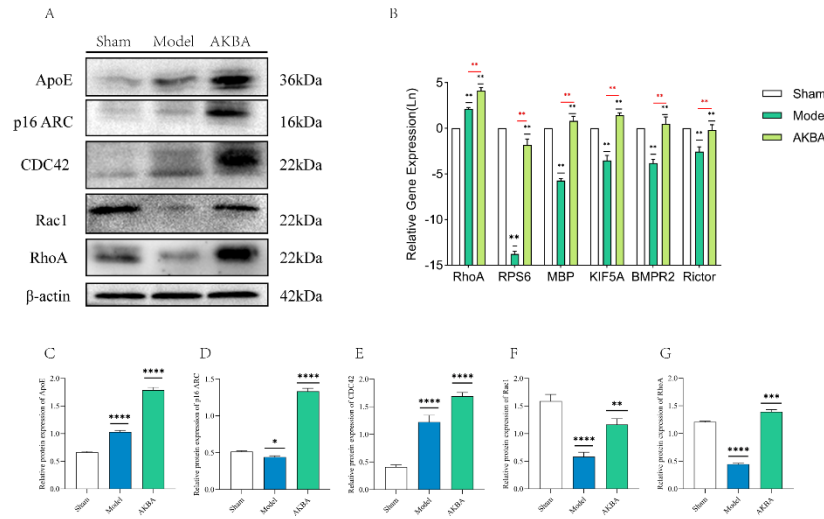

Figure S1. RT-qPCR and Western Blot to verify proteomics. A: Immunoblot of ApoE, p16 ARC, CDC42, Rac1 and RhoA. B: RT-qPCR of RhoA, RPS6, MBP, KIF5A, BMPR2 and Rictor. C: Quantification of ApoE immunoblots. D: Quantification of p16 ARC immunoblots. E: Quantification of CDC42 immunoblots. F: Quantification of immunoblot of Rac1. G: Quantification of immunoblot of RhoA.

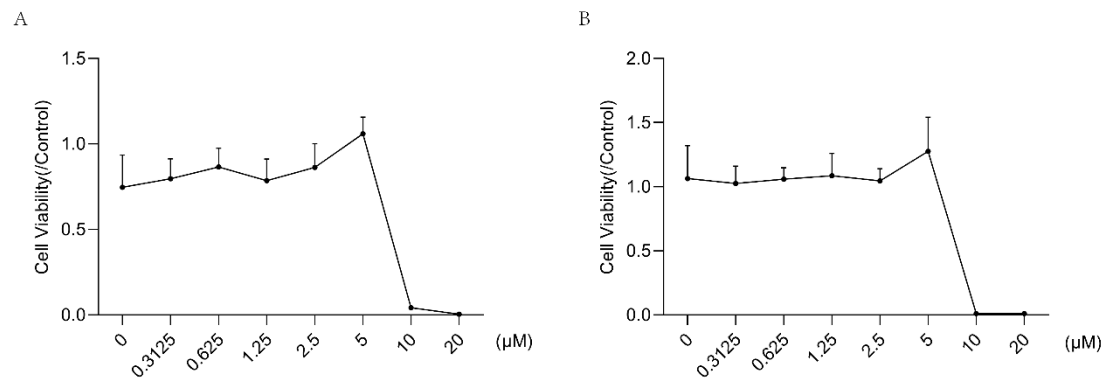

Figure S2. Proliferative and toxic effects of different concentrations of AKBA on PC12 cells. A: Cell viability of PC12 cells after 12 h of different concentrations of AKBA. B: Cell viability of PC12 cells after 24 h of different concentrations of AKBA. B: cell viability of PC12 cells after 24 h of AKBA.

Table S1 Primer sequence list.

| Target gene | Primer sequence                                                              |
|-------------|------------------------------------------------------------------------------|
| Rho A       | Forward: 5'-AGGATTGGCGCTTTTGGGTA-3'<br>Reverse: 3'-ATGAGGCACCCCGACTTTTT-5'   |
| RPS6        | Forward: 5'-GCGCCTGCTTTTGAGTAAGG-3'<br>Reverse: 3'-CAGGTTGGCATCCACAATGC-5'   |
| MBP         | Forward: 5'-CGCAGAGGACCCAAGATGAA-3'<br>Reverse: 3'-AAATCTGCTGAGGGACAGGC-5'   |
| KIF5A       | Forward: 5'-CACGACTCAGGAGCAGGTTT-3'<br>Reverse: 3'-TGGTTGAAGATGTCTCGGGC-5'   |
| BMPR2       | Forward: 5'-CAAGAACGGCTGTGTGCATT-3'<br>Reverse: 3'-CAGACCATAACATGTGCTCCCT-5' |
| Rictor      | Forward: 5'-TGCACCCATCCTTGTCTCAC-3'<br>Reverse: 3'-CTGATTCCCCCGACATGCTT-5'   |
| GAPDH       | Forward: 5'-GCATCTTCTTGTGCAGTGCC-3'<br>Reverse: 3'-GATGGTGATGGGTTTCCCGT-5'   |
